# Supplementary material
Source: HighWire-hosted journal article supplement (http://ajnr-stage2.highwire.org/highwire/filestream/183315/field_highwire_adjunct_files/0/1033.pdf)
Supplement: 1033.pdf [file 1033.pdf]

## ONLINE APPENDIX

### VASCULAR RISK FACTORS

Baseline smoking habits and alcohol intake were assessed with questionnaires. Packyears of smoking was calculated and alcohol intake was categorized as 'no or <1 U per week', '1–10 U per week', and '≥11 U per week'. Height and weight were measured, and the body mass index (BMI) was calculated ( $\text{kg}/\text{m}^2$ ). Systolic blood pressure (SBP) (mm Hg) and diastolic blood pressure (DBP) (mm Hg) were measured three times with a sphygmomanometer, and the average of these measures was calculated. Hypertension was defined as a mean SBP of >140 mm Hg, a mean DBP of >90 mm Hg or self-reported use of antihypertensive drugs. An overnight fasting venous blood sample was taken to determine glucose, lipids, total homocysteine and apolipoprotein-B levels. Diabetes mellitus was defined as fasting serum glucose levels of  $\geq 7.0$  mmol/l, and/or use of glucose-lowering medication, and/or a known history of diabetes. Hyperlipidemia

was considered if the serum cholesterol was  $\geq 5.0$  mmol/l, a low-density lipoprotein cholesterol of  $>3.2$  mmol/l, or if the patient was by using lipid lowering medication. History of stroke was based on a composite scoring made of neurologist-verified self-reported symptoms of previous stroke, previous history of carotid artery operation, or a physician diagnosis at study inclusion of the following conditions: transient ischemic attack, brain infarct, ischemic stroke, cerebral ischemia, amaurosis fugax or retinal infarction. Mean carotid intima-media thickness (in mm) was calculated for the left and right common carotid arteries based on six far-wall measurements on sonography. Ankle brachial index measurements were made by using a Vasoguard Doppler probe (8 MHz) and measurement techniques have been described in detail elsewhere.<sup>1</sup> Metabolic syndrome was determined by the National Cholesterol Education Program Adult Treatment Panel III criteria.<sup>2</sup> Genotyping for apolipoprotein-E

(Apo-E) was performed on coded DNA specimens and has been described in detail elsewhere.<sup>3</sup>

### MR IMAGING PROTOCOL

High-field imaging of the brain was performed on a whole-body 7T MR system (Philips Health care, Cleveland, OH, USA) with a volume transmit and 32-channel receive head coil (Nova Medical, Wilmington, MA, USA). The standardized scan protocol is described in detail in previous publications.<sup>4,5</sup>

Conventional MR imaging of the brain was performed on a 1.5T whole-body system (Gyrosan ACS-NT, Philips Medical Systems, Best, the Netherlands) by using a standardized scan protocol described in detail in previous work.<sup>6,7</sup>

### ASSESSMENT OF COGNITIVE FUNCTIONING

Memory was assessed with the 15 Word Learning Test by using a composite score of the immediate and delayed recall based on five trials, and the Rey-Osterrieth Complex figure test.<sup>8,9</sup> Executive functioning was assessed with the Verbal Fluency test by using animals as categories (2 minutes) and the letter A (1 minute); the Visual Elevator test (10 trials), and the Brixton Spatial Anticipation test.<sup>10–12</sup> Working memory was assessed with the combined longest span scores and total span scores

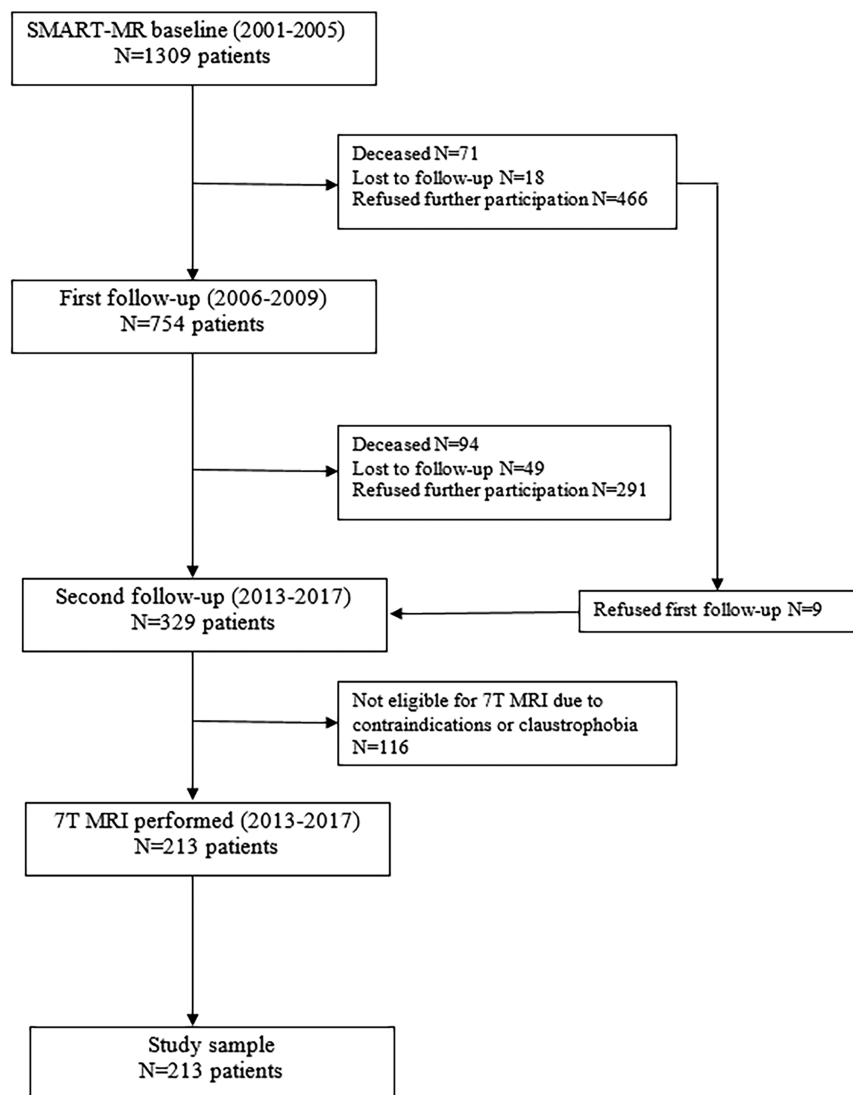

FIG 1. Participation flowchart of the SMART-MR study.

**Online Table 1: Baseline vascular risk factors of the study population (n = 1309) according to presence or absence of 7T brain MR imaging data**

|                                  | Patients with a<br>7T brain MR imaging scan (n = 213) | Patients without a<br>7T brain MR imaging scan (n = 1096) | p Value            |
|----------------------------------|-------------------------------------------------------|-----------------------------------------------------------|--------------------|
| Age (years)                      | 55 ± 8                                                | 59 ± 10                                                   | <0.001             |
| Sex, % men                       | 82.6                                                  | 79.1                                                      | 0.242              |
| History of stroke, %             | 24.4                                                  | 22.8                                                      | 0.611              |
| BMI (kg/m <sup>2</sup> )         | 27 ± 3                                                | 27 ± 4                                                    | 0.628              |
| Smoking, pack years <sup>a</sup> | 21 (0, 47)                                            | 23 (0, 52)                                                | 0.772 <sup>b</sup> |
| Alcohol use, % current           | 85                                                    | 73                                                        | <0.001             |
| Hypertension, %                  | 51.2                                                  | 52.0                                                      | 0.823              |
| Diabetes mellitus, %             | 11.5                                                  | 22.7                                                      | <0.001             |
| Carotid artery stenosis ≥70%, %  | 7.4                                                   | 11.9                                                      | 0.06               |
| IMT (mm)                         | 0.9 ± 0.2                                             | 1.0 ± 0.3                                                 | <0.001             |
| ABI                              | 1.2 ± 0.2                                             | 1.1 ± 0.2                                                 | <0.001             |

Characteristics are presented as mean ± SD or %.

BMI: body mass index; SD: standard deviation; IMT: intima-media thickness; ABI: ankle brachial index.

<sup>a</sup>Median (10th percentile, 90th percentile).

<sup>b</sup>Natural log-transformed due to a non-normal distribution in the statistical analysis.

of the Forward Digit Span and Backward Digit Span.<sup>13</sup> Processing speed was assessed with the Digit Symbol Substitution Test (120 seconds).<sup>14</sup>

## REFERENCES

- Hendriks EJ, Westerink J, de Jong PA, SMART Study Group, et al. Association of High Ankle Brachial Index With Incident Cardiovascular Disease and Mortality in a High-Risk Population. *Arterioscler Thromb Vasc Biol* 2016;36:412–417 CrossRef Medline
- Third Report of the National Cholesterol Education Program (NCEP) Expert Panel on Detection, Evaluation, and Treatment of High Blood Cholesterol in Adults (Adult Treatment Panel III) final report. *Circulation* 2002;106:3143–3421
- Jochimsen HM, Muller M, van der Graaf Y, et al. APOE epsilon4 differentially influences change in memory performance depending on age. The SMART-MR study. *Neurobiol Aging* 2012;33:832.e815–822
- Visser F, Zwanenburg JJ, Hoogduin JM, et al. High-resolution magnetization-prepared 3D-FLAIR imaging at 7.0 Tesla. *Magn Reson Med* 2010;64:194–202 CrossRef Medline
- Ghaznawi R, de Bresser J, van der Graaf Y et al. Detection and characterization of small infarcts in the caudate nucleus on 7 Tesla MRI: The SMART-MR study. *J Cereb Blood Flow Metab* 2018;38:1609–1617 CrossRef Medline
- Geerlings MI, Appelman AP, Vincken KL, SMART Study Group, et al. Brain volumes and cerebrovascular lesions on MRI in patients with atherosclerotic disease. The SMART-MR study. *Atherosclerosis* 2010;210:130–136 CrossRef Medline
- Ghaznawi R, Geerlings MI, Jaarsma-Coes MG, et al. The association between lacunes and white matter hyperintensity features on MRI: The SMART-MR study. *J Cereb Blood Flow Metab* 2019;39:2486–2496 CrossRef Medline
- Lu PH, Boone KB, Cozolino L, et al. Effectiveness of the Rey-Osterrieth Complex Figure Test and the Meyers and Meyers recognition trial in the detection of suspect effort. *Clin Neuropsychol* 2003;17:426–440 CrossRef
- Brand N, Jolles J. Learning and retrieval rate of words presented auditorily and visually. *J Gen Psychol* 1985;112:201–210 CrossRef Medline
- Wilkins AJ, Shallice T, McCarthy R. Frontal lesions and sustained attention. *Neuropsychologia* 1987;25:359–365 CrossRef Medline
- Robertson IH, Ward T, Ridgeway V, et al. The structure of normal human attention: The Test of Everyday Attention. *J Int Neuropsychol Soc* 1996;2:525–534 CrossRef Medline
- Burgess PW, Shallice T. Bizarre responses, rule detection and frontal lobe lesions. *Cortex* 1996;32:241–259 CrossRef Medline
- Wechsler D. *Psychological C and Pearson Education I. WAIS-IV: Wechsler adult intelligence scale* 2008
- Lezak MD, Lezak MD. *Neuropsychological assessment*. Oxford; New York: Oxford University Press 2004
